# Supplementary material for: Neural Correlates of Emotional Distractibility in Bipolar Disorder Patients, Unaffected Relatives, and Individuals With Hypomanic Personality
Source: Atypon-hosted journal article supplement (doi:10.1176/appi.ajp.2013.12081044), 2013-08-28
Supplement: 1487_ds001.pdf [file 1487_ds001.pdf]

 


Psychiatry Online
